# Supplementary material for: Clinical and Genomic Evolution of Carbapenem-Resistant Klebsiella pneumoniae Bloodstream Infections over Two Time Periods at a Tertiary Care Hospital in South India: A Prospective Cohort Study
Source: PubMed Central journal article supplement — Infect Dis Ther. 2023 Apr 16;12(5):1319–35. doi: 10.1007/s40121-023-00803-3 (PMC10229510; doi:10.1007/s40121-023-00803-3), 2023-04-16
Supplement: 40121_2023_803_MOESM1_ESM.pdf [file 40121_2023_803_MOESM1_ESM.pdf]

## **Supplementary Material**

### **Clinical and genomic evolution of carbapenem-resistant *Klebsiella pneumoniae* bloodstream infections over two time periods at a tertiary care hospital in South India - a prospective cohort study**

**Authors:** Abi Manesh<sup>1</sup>, Chaitra Shankar<sup>2</sup>, Mithun M George<sup>1</sup>, Davinder S Jasrotia<sup>1</sup>, Binesh Lal<sup>2</sup>, Biju George<sup>4</sup>, Vikram Mathews<sup>4</sup>, C.E. Eapen<sup>5</sup>, Philip Joseph<sup>6</sup>, K Subramani<sup>7</sup>, Shoma Rao<sup>7</sup>, John V Peter<sup>7</sup>, Binila Chacko<sup>7</sup>, Anand Zachariah<sup>3</sup>, Sowmya Sathyendra<sup>3</sup>, Samuel G Hansdak<sup>3</sup>, Ooriapadickal C Abraham<sup>3</sup>, Ramya Iyadurai<sup>3</sup>, Saranya Vijayakumar<sup>2</sup>, Rajiv Karthik<sup>1</sup>, Charis A Marwick<sup>8</sup>, Benjamin J Parcell<sup>9</sup>, Ian H. Gilbert<sup>10</sup>, Balaji Veeraraghavan<sup>2#\*</sup>, George M Varghese<sup>1#\*</sup>

<sup>1</sup>Department of Infectious Diseases, Christian Medical College, Vellore, Tamil Nadu, India

<sup>2</sup>Department of Clinical Microbiology, Christian Medical College, Vellore, Tamil Nadu, India

<sup>3</sup>Department of Medicine, Christian Medical College, Vellore, Tamil Nadu, India

<sup>4</sup>Department of Haematology, Christian Medical College, Vellore, Tamil Nadu, India

<sup>5</sup>Department of Hepatology, Christian Medical College, Vellore, Tamil Nadu, India

<sup>6</sup>Department of Hepatobiliary Surgery, Christian Medical College, Vellore, Tamil Nadu, India

<sup>7</sup>Division of Critical care, Christian Medical College, Vellore, Tamil Nadu, India

<sup>8</sup>Population Health and Genomics, University of Dundee, United Kingdom

<sup>9</sup>Ninewells Hospital and Medical School, Dundee, United Kingdom

<sup>10</sup>Division of Biological Chemistry and Drug Discovery, University of Dundee, United Kingdom

**Article Note**

#\* Balaji Veeraraghavan and George M Varghese are co-corresponding authors and contributed equally to this manuscript.

\*Corresponding author:

Dr George M Varghese MD, DNB, DTMH, FRCP, FIDSA

Professor, Department of Infectious Diseases

Christian Medical College, Vellore 632004

Phone: +91-9487393015; Email address: [georgemvarghese@hotmail.com](mailto:georgemvarghese@hotmail.com)

\*Co- corresponding author:

Dr. Balaji Veeraraghavan MD, PhD, FRCP

Professor, Dept of Clinical Microbiology,

Christian Medical College, Vellore 632004

Phone: + 91-94422 10555; Email address: [vbhaji@cmcvellore.ac.in](mailto:vbhaji@cmcvellore.ac.in)

## **Microbiology methods for genomic analysis supplement**

DNA was extracted from 18- to 24-hour cultures using Wizard Genomic DNA purification Kit (Promega) as per manufacturer's instructions. The DNA was quantified using Nanodrop (Thermo Fisher) and subjected to short-read sequencing using Illumina HiSeq as per the manufacturer's instructions. Sequencing reads with a PHRED quality score below 20 were discarded, and adapters were trimmed using cutadapt v1.8.1 and assessed with FastQC v0.11.4 (1,2). Draft genome sequence data generated using Illumina were assembled using SPAdes (v.3.13.0) (3). The genome sequences were polished using high-quality Illumina reads, as described previously using Pilon (4). The assembled genomes were subjected to quality assessments using CheckM v1.0.5 and Quast v4.5 (5,6). *K. pneumoniae* NTUH-K2044 (GenBank accession number AP006725) was used as the reference genome since it is a well-characterized type-strain of hypervirulent *K. pneumoniae* ST23.CRhVkp in the study was defined as the presence of *rmpA2* and/or aerobactin.

Genome assemblies were submitted to NCBI GenBank and annotated using the NCBI Prokaryotic Genome Annotation Pipeline [PGAP v.4.1] (7). The antimicrobial resistance profiles of the assembled genome sequences were identified using Resfinder v.4.1 available from the CGE server (8). Similarly, the presence of plasmids in the genomes was identified and characterized using PlasmidFinder (v.1.3) available at the CGE server (9). MLST and virulence loci (*yersiniabactin*, aerobactin, and other siderophore production systems) were identified using Kleborate (v.2.0.0) (10). The presence of virulence factors was confirmed using the virulence database at Pasteur Institute for *K. pneumoniae* (11). Pairwise distances between the nine isolates were determined with *K. pneumoniae* NTUH-K2044 as the reference using SNP-dists v 0.6.3 (12) from the raw reads by aligning the short reads of each isolate against the reference. Single nucleotide

polymorphism (SNP) based phylogenetic trees of the ST14, ST15, ST16, and ST231 isolates which were isolated five years apart were constructed using CSI phylogeny (<https://cge.cbs.dtu.dk/se>).

### **CLSI, EUCAST and FDA guidelines used in the study**

1. Clinical and Laboratory Standards Institute. 2014. Performance standards for antimicrobial susceptibility testing; 24th informational supplement. M100. Clinical and Laboratory Standards Institute, Wayne, PA.
2. Clinical and Laboratory Standards Institute. 2015. Performance standards for antimicrobial susceptibility testing; 25th informational supplement. M100. Clinical and Laboratory Standards Institute, Wayne, PA.
3. Clinical and Laboratory Standards Institute. 2021. Performance standards for antimicrobial susceptibility testing; 31th informational supplement. M100. Clinical and Laboratory Standards Institute, Wayne, PA.
4. Clinical and Laboratory Standards Institute. 2022. Performance standards for antimicrobial susceptibility testing; 32nd informational supplement. M100. Clinical and Laboratory Standards Institute, Wayne, PA.
5. The European Committee on Antimicrobial Susceptibility Testing. Breakpoint tables for interpretation of MICs and zone diameters. Version 4.0; 2014.
6. The European Committee on Antimicrobial Susceptibility Testing. Breakpoint tables for interpretation of MICs and zone diameters. Version 5.0; 2015.
7. The European Committee on Antimicrobial Susceptibility Testing. Breakpoint tables for interpretation of MICs and zone diameters. Version 11.0; 2021.
8. The European Committee on Antimicrobial Susceptibility Testing. Breakpoint tables for interpretation of MICs and zone diameters. Version 12.0; 2022.

9. TYGACIL® (TIGECYCLINE) FOR INJECTION [Internet]. Available from:  
[http://www.accessdata.fda.gov/drugsatfda\\_docs/label/2009/021821s016lbl.pdf](http://www.accessdata.fda.gov/drugsatfda_docs/label/2009/021821s016lbl.pdf)

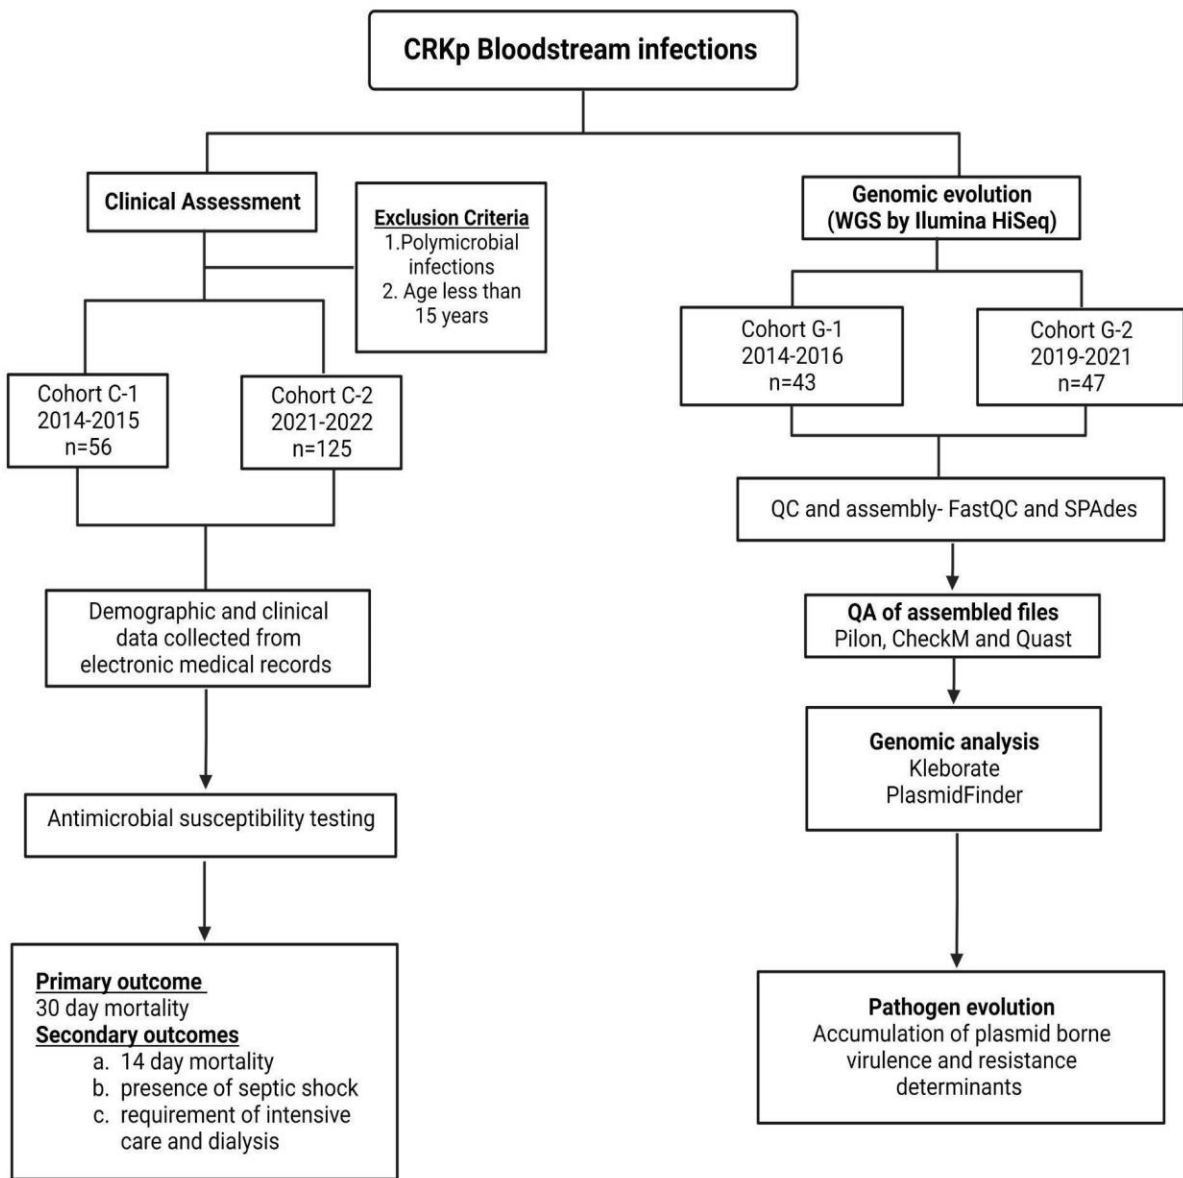

**Figure S1: Study algorithm with clinical and genomic methodologies**

**Table S1:****a) Clinical details of study participants**

| <b>Characteristics</b>                  | <b>Baseline characteristics</b> |                               |                                | <b>p-value</b> |
|-----------------------------------------|---------------------------------|-------------------------------|--------------------------------|----------------|
|                                         | <b>Total<br/>n=181(%)</b>       | <b>Cohort C-1<br/>n=56(%)</b> | <b>Cohort C-2<br/>n=125(%)</b> |                |
| <b>Risk Factors</b>                     |                                 |                               |                                |                |
| Hematological                           | 72 (39.8)                       | 32 (57.1)                     | 40 (32)                        | 0.001          |
| Non hematological                       | 109 (60.2)                      | 24 (42.9)                     | 85 (68)                        |                |
| Trauma within 30 days before bacteremia | 4 (2.2)                         | 2 (3.6)                       | 2 (1.6)                        | 0.59           |
| Duration of bacteremia:                 |                                 |                               |                                |                |
| Persistent bacteremia                   | 28 (15.47)                      | 12 (21.43)                    | 16 (12.8)                      |                |
| Cleared bacteremia                      | 117 (64.64)                     | 37 (66.07)                    | 80 (64)                        | 0.03           |
| Death within 48 hours                   | 21 (11.6)                       | 7 (12.5)                      | 14 (11.2)                      |                |
| No FUBC                                 | 15 (8.29)                       | 0                             | 15 (12)                        |                |
| <b>Therapy types</b>                    |                                 |                               |                                |                |
| <b>Treatment type:</b>                  |                                 |                               |                                |                |
| Combination therapy                     | 62 (34.3)                       | 10 (17.9)                     | 52 (41.6)                      |                |
| Monotherapy                             | 101 (55.8)                      | 46 (82.1)                     | 55 (44)                        | <0.001         |
| Not treated appropriately               | 18 (9.9)                        | 0                             | 18 (14.4)                      |                |

Type of Monotherapy (n=101):

|                   |            |            |            |        |
|-------------------|------------|------------|------------|--------|
| Polymyxin         | 80 (79.21) | 37 (80.43) | 43 (78.18) |        |
| CAZ-AVI           | 12 (11.88) | 0          | 12 (21.82) | <0.001 |
| Other antibiotics | 9 (8.91)   | 9 (19.57)  | 0          |        |

Type of Combination therapy (n=62):

|                             |            |        |           |        |
|-----------------------------|------------|--------|-----------|--------|
| Polymyxin based             | 12 (19.35) | 5 (50) | 7 (13.5)  |        |
| CAZ-AVI based               | 9 (14.58)  | 0      | 9 (17.3)  | <0.001 |
| Polymyxin and CAZ-AVI based | 36 (58.06) | 0      | 36 (69.2) |        |
| Other antibiotics           | 5 (8.06)   | 5 (50) | 0         |        |

---

Abbreviations: ICU, intensive care unit; FUBC, follow-up blood culture; IQR, interquartile range



b) Risk factors for 30-day mortality among study participants

| Characteristics                         | Outcome        |                | Univariate analysis |         |
|-----------------------------------------|----------------|----------------|---------------------|---------|
|                                         | Alive<br>n (%) | Death<br>n (%) | HR<br>(95% CI)      | p-value |
| <b>Risk Factors: Hematological</b>      | 42 (46.15)     | 30 (33.33)     | 0.72 (0.46, 1.12)   | 0.14    |
| Trauma within 30 days before bacteremia | 3 (3.3)        | 1 (1.11)       | 0.45 (0.06, 3.24)   | 0.43    |
| Duration of bacteremia:                 |                |                |                     |         |
| Persistent bacteremia                   | 13 (14.29)     | 15 (16.67)     | 1.63 (0.91, 2.94)   | 0.10    |
| Cleared bacteremia                      | 74 (81.32)     | 44 (48.89)     | Ref                 |         |
| Death within 48 hours                   | 0              | 20 (22.22)     |                     |         |
| No FUBC                                 | 4 (4.40)       | 11 (12.22)     |                     |         |
| <b>Therapy types</b>                    |                |                |                     |         |
| <b>Treatment type:</b>                  |                |                |                     |         |
| Combination therapy                     | 34 (37.36)     | 28 (31.11)     | 0.85 (0.54, 1.35)   | 0.50    |
| Monotherapy                             | 49 (53.85)     | 52 (57.78)     | Ref                 |         |
| Not treated appropriately               | 8 (8.79)       | 10 (11.11)     | 1.29 (0.66, 2.54)   | 0.46    |

| Characteristics                     | Outcome        |                | Univariate analysis |         |
|-------------------------------------|----------------|----------------|---------------------|---------|
|                                     | Alive<br>n (%) | Death<br>n (%) | HR<br>(95% CI)      | p-value |
| Type of Monotherapy (n=101):        |                |                |                     |         |
| Polymyxin                           | 41 (83.67)     | 39 (75)        | Ref                 |         |
| CAZ-AVI                             | 4 (8.16)       | 8 (15.38)      | 1.33 (0.62, 2.85)   | 0.47    |
| Other antibiotics                   | 4 (8.16)       | 5 (9.62)       | 1.34 (0.53, 3.40)   | 0.53    |
| Type of Combination therapy (n=62): |                |                |                     |         |
| Polymyxin based                     | 5 (14.71)      | 7 (25)         | Ref                 |         |
| CAZ-AVI based                       | 4 (11.76)      | 5 (17.86)      | 0.84 (0.27, 2.65)   | 0.77    |
| Polymyxin and CAZ-AVI based         | 23 (67.65)     | 13 (46.43)     | 0.47 (0.19, 1.17)   | 0.10    |
| Other antibiotics                   | 2 (5.88)       | 3 (10.71)      | 0.99 (0.26, 3.85)   | 0.99    |

Abbreviations: FUBC, follow-up blood culture; IQR, interquartile range



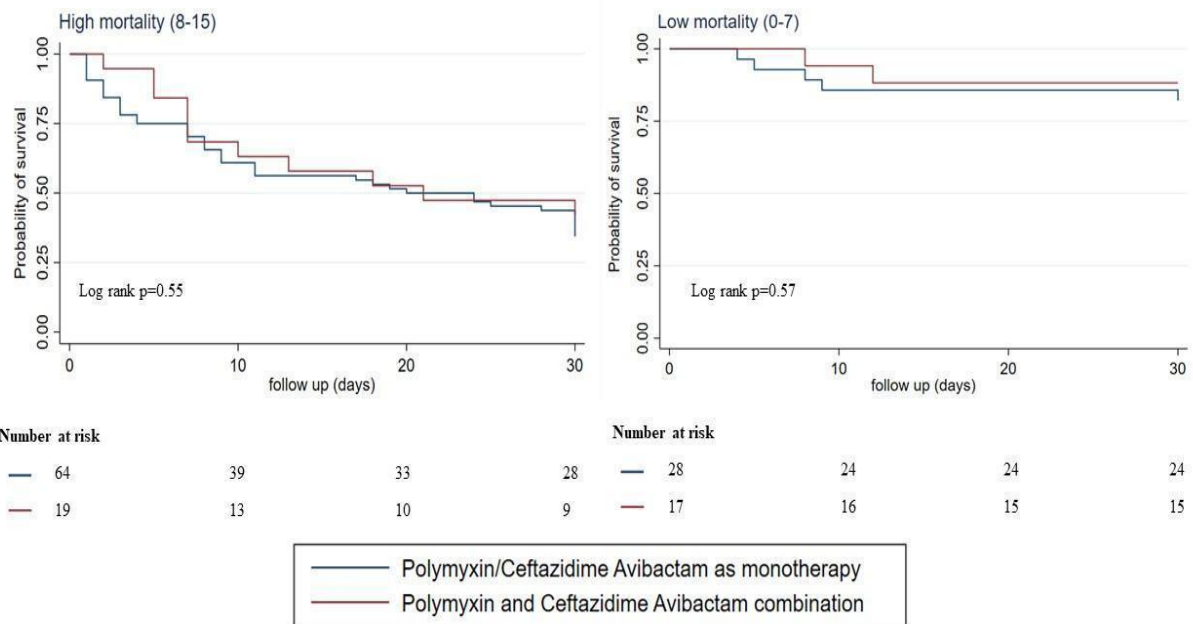

**Figure S3: Survival curves among patients who received monotherapy or combination therapy at 30 days as stratified by INCREMENT score**

## References

1. Martin M. Cutadapt removes adapter sequences from high-throughput sequencing reads. *EMBnet.journal*. 2011 May 2;17(1):10–2.
2. Babraham Bioinformatics - FastQC A Quality Control tool for High Throughput Sequence Data [Internet]. [cited 2022 Jul 8]. Available from: <https://www.bioinformatics.babraham.ac.uk/projects/fastqc/>
3. Bankevich A, Nurk S, Antipov D, Gurevich AA, Dvorkin M, Kulikov AS, et al. SPAdes: A New Genome Assembly Algorithm and Its Applications to Single-Cell Sequencing. *J Comput Biol*. 2012 May;19(5):455–77.
4. Walker BJ, Abeel T, Shea T, Priest M, Abouelliel A, Sakthikumar S, et al. Pilon: An Integrated Tool for Comprehensive Microbial Variant Detection and Genome Assembly Improvement. *PLOS ONE*. 2014 Nov 19;9(11):e112963.
5. Parks DH, Imelfort M, Skennerton CT, Hugenholtz P, Tyson GW. CheckM: assessing the quality of microbial genomes recovered from isolates, single cells, and metagenomes. *Genome Res*. 2015 Jul;25(7):1043–55.
6. Gurevich A, Saveliev V, Vyahhi N, Tesler G. QUAST: quality assessment tool for genome assemblies. *Bioinforma Oxf Engl*. 2013 Apr 15;29(8):1072–5.
7. NCBI prokaryotic genome annotation pipeline | Nucleic Acids Research | Oxford Academic [Internet]. [cited 2022 Jul 8]. Available from: <https://academic.oup.com/nar/article/44/14/6614/2468204?login=true>
8. ResFinder 4.0 for predictions of phenotypes from genotypes | Journal of Antimicrobial Chemotherapy | Oxford Academic [Internet]. [cited 2022 Jul 8]. Available from: <https://academic.oup.com/jac/article/75/12/3491/5890997?login=true>

9. PlasmidFinder and In Silico pMLST: Identification and Typing of Plasmid Replicons in Whole-Genome Sequencing (WGS) | SpringerLink [Internet]. [cited 2022 Jul 8]. Available from: [https://link.springer.com/protocol/10.1007/978-1-4939-9877-7\\_20](https://link.springer.com/protocol/10.1007/978-1-4939-9877-7_20)
10. A genomic surveillance framework and genotyping tool for *Klebsiella pneumoniae* and its related species complex | Nature Communications [Internet]. [cited 2022 Jul 8]. Available from: <https://www.nature.com/articles/s41467-021-24448-3>
11. Jolley KA, Maiden MC. BIGSdb: Scalable analysis of bacterial genome variation at the population level. *BMC Bioinformatics*. 2010 Dec 10;11(1):595.
12. Wysocka M, Zamudio R, Oggioni MR, Gołębiewska J, Dudziak A, Krawczyk B. The New *Klebsiella pneumoniae* ST152 Variants with Hypermucoviscous Phenotype Isolated from Renal Transplant Recipients with Asymptomatic Bacteriuria—Genetic Characteristics by WGS. *Genes*. 2020 Oct 13;11(10):118
